# Supplementary material for: Neonicotinoid Insecticides Alter the Gene Expression Profile of Neuron-Enriched Cultures from Neonatal Rat Cerebellum
Source: PubMed Central journal article supplement (PMC5086726; doi:10.3390/ijerph13100987), 2016-10-04
Supplement: ijerph-13-00987-s001.pdf [file ijerph-13-00987-s001.pdf]

## Supplementary Materials: Neonicotinoid Insecticides Alter the Gene Expression Profile of Neuron-Enriched Cultures from Neonatal Rat Cerebellum

Junko Kimura-Kuroda, Yasumasa Nishito, Hiroko Yanagisawa, Yoichiro Kuroda, Yukari Komuta, Hitoshi Kawano and Masaharu Hayashi

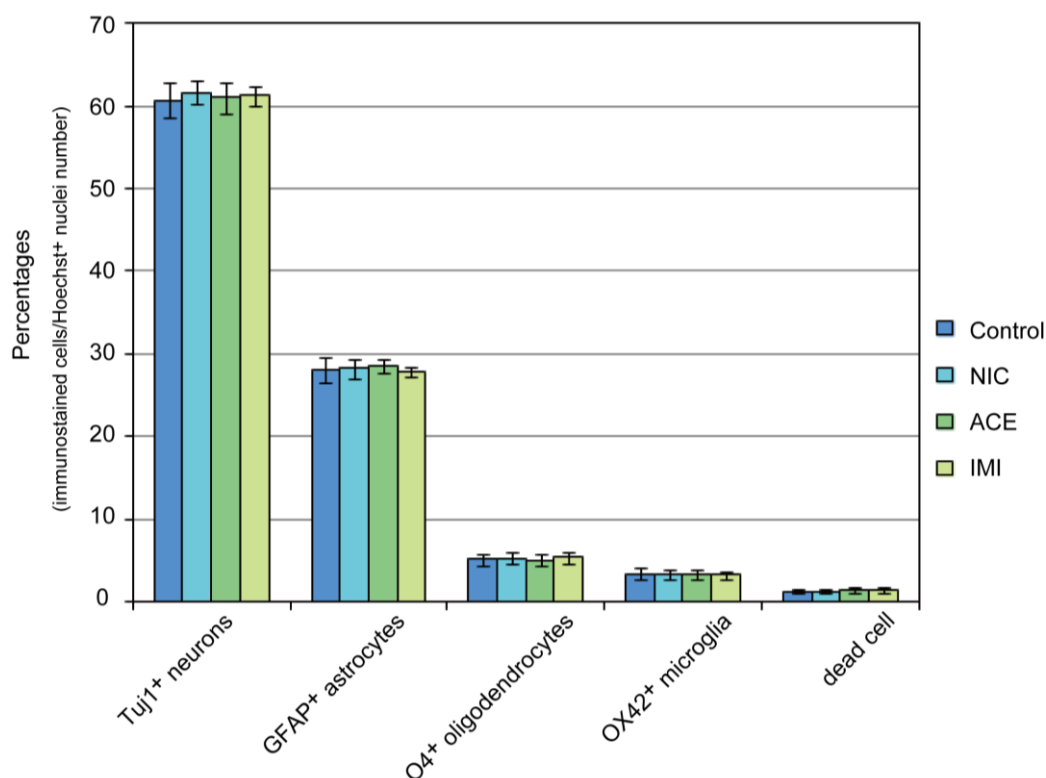

**Figure S1.** Percentages of cell types in cerebellar neuron-enriched cultures. At 16 DIV, the cultured cerebellar cells were fixed and stained with specific neural antibodies; mouse monoclonal anti-Tuj1 as a neuronal marker, rabbit anti-GFAP as an astrocyte marker, mouse anti-oligodendrocyte marker O4, mouse anti-CD11b OX42 IgM as a microglial marker, and Hoechst 33342 as a nucleus. The percentages were calculated from the number of immunostained cells per Hoechst<sup>+</sup>-nuclei number ( $n =$  approximately 1000 per treatment group per experiment) of three to four experiments, using MetaMorph imaging software. Error bars show standard deviations. No significant differences of neural cell percentages were observed between control and nicotine (NIC)-, acetamidrid (ACE)-, and imidacloprid (IMI)-treatments.

**Table S1.** Oligonucleotide primers used for qRT-PCR in the 5'–3' direction.

| Gene Name | Sense                | Antisense             | Product (Base Pair) | Accession Number |
|-----------|----------------------|-----------------------|---------------------|------------------|
| B3gnt9    | GGTTTGACCAGCACAGAAGC | GGGAAGCCAATGTAGAGAAGG | 189                 | XM_226431        |
| Cadm3     | CCCTCAAGATGACCCAAGAG | CAGCAGGAAGACGATGAAAG  | 209                 | NM_001047103     |
| Lyn       | TTGAACCGAAGTCACCGTGG | ATTCAGGAACTGGCCTTTC   | 201                 | NM_030857        |
| Magel2    | CCAAAGGCAACAGACAATGG | GACACCAAACAGGGAACCAC  | 214                 | XM_001054803     |
| Rbfox2    | GTAATCCACGCCCAAGC    | GCCAAACTGCCCAAACATC   | 89                  | NM_001079895     |
| Actb      | CCTCTATGCCAACACAGTGC | GTACTCCTGCTTGCTGATCC  | 211                 | NM_031144        |
| Gapdh     | GACATGCCGCTGGAGAAAC  | AGCCCAGGATGCCCTTTAGT  | 92                  | NM_017008        |

For *Atp5f1*, *Bche*, *Cacna1h*, *Cacng1*, *Dcdc2*, *F2rl2*, *Gpr83*, *Htr2c*, *Mb*, *Mcm2dc2*, *Myog*, *Mypn*, *Pcdhgb7*, *Tada2b*, *Tnni2*, *Txk*, *Unc45b*, *Chrna3*, *Chrna4*, and *Chrna7*, ready-made primers were purchased from TAKARA Perfect Real Time PCR System (TAKARA, Tokyo, Japan).

**Table S2.** Standard deviations and standard errors of 34 DE genes for CvN, CvA, and CvI.

| Gene Symbol                | <i>n</i> | log <sub>2</sub> FC | SD    | SE    |
|----------------------------|----------|---------------------|-------|-------|
| <b>34 DE genes for CvN</b> |          |                     |       |       |
| Acta1                      | 6        | -1.255              | 1.330 | 0.543 |
| Actrt2                     | 6        | -0.933              | 1.446 | 0.590 |
| Ankrd60                    | 6        | -0.969              | 1.057 | 0.431 |
| Atf7                       | 6        | 0.664               | 0.882 | 0.360 |
| Cacna1h                    | 6        | 0.737               | 0.353 | 0.144 |
| Cacng1                     | 6        | -1.080              | 0.980 | 0.400 |
| Cadm3                      | 6        | 0.611               | 0.759 | 0.310 |
| Car3                       | 6        | -0.753              | 0.689 | 0.281 |
| Cd86                       | 6        | 0.602               | 0.525 | 0.214 |
| Celf6                      | 6        | 0.724               | 0.583 | 0.238 |
| Cramp11                    | 6        | 1.218               | 1.268 | 0.518 |
| Cyp17a1                    | 6        | -0.590              | 0.632 | 0.258 |
| F2rl2                      | 6        | 1.023               | 1.279 | 0.522 |
| Gpr83                      | 6        | 0.752               | 0.455 | 0.186 |
| Gramd4                     | 6        | 0.708               | 1.101 | 0.450 |
| Ihh                        | 6        | 0.911               | 1.012 | 0.413 |
| Kcnq5                      | 6        | 1.864               | 1.782 | 0.728 |
| Klhl18                     | 6        | 0.624               | 0.342 | 0.139 |
| Lmod3                      | 6        | -2.013              | 1.439 | 0.587 |
| LOC317356                  | 6        | 1.065               | 1.323 | 0.540 |
| Mcmcdc2                    | 6        | 0.733               | 0.481 | 0.196 |
| Ms4a12                     | 6        | -0.589              | 0.393 | 0.161 |
| Mypn                       | 6        | -0.661              | 0.453 | 0.185 |
| Ndufaf2                    | 6        | -0.785              | 0.615 | 0.251 |
| Nhlh2                      | 6        | -0.678              | 0.459 | 0.187 |
| Nt5dc1                     | 6        | 0.661               | 0.803 | 0.328 |
| Olr1051                    | 6        | -1.275              | 1.409 | 0.575 |
| Pcdhgb7                    | 6        | 0.951               | 1.139 | 0.465 |
| Phldb3                     | 6        | -0.845              | 1.265 | 0.517 |
| Sdr42e2                    | 6        | -0.783              | 0.637 | 0.260 |
| Tada2b *                   | 5 *      | 0.661               | 0.453 | 0.203 |
| Unc45b                     | 6        | -0.747              | 0.849 | 0.347 |
| Vsig2                      | 6        | 0.635               | 0.836 | 0.341 |
| Zp3                        | 6        | -0.822              | 0.944 | 0.385 |
| <b>48 DE genes for CvA</b> |          |                     |       |       |
| Actc1                      | 6        | -1.139              | 1.427 | 0.583 |
| Actrt2                     | 6        | -1.079              | 1.193 | 0.487 |
| Ankrd60                    | 6        | -0.874              | 1.234 | 0.504 |
| Asap2                      | 6        | 0.636               | 0.403 | 0.164 |
| B3gnt9                     | 6        | 1.805               | 1.934 | 0.789 |
| Cacna1h                    | 6        | 0.706               | 0.378 | 0.154 |
| Cacng1                     | 6        | -0.991              | 1.127 | 0.460 |
| Cramp11                    | 6        | 0.733               | 1.003 | 0.409 |
| Dcdc2                      | 6        | -0.760              | 1.093 | 0.446 |
| Des                        | 6        | -1.636              | 2.106 | 0.860 |
| Dmbt1                      | 6        | -0.888              | 1.248 | 0.509 |
| Dupd1                      | 6        | 1.838               | 1.871 | 0.764 |
| F2rl2                      | 6        | 0.892               | 0.900 | 0.368 |
| Fyb                        | 6        | 0.587               | 0.615 | 0.251 |
| Hrh2                       | 6        | 1.292               | 0.965 | 0.394 |
| Hsd3b1                     | 6        | -0.907              | 0.870 | 0.355 |
| Hspb7                      | 6        | -1.067              | 1.306 | 0.533 |
| Iqcf1                      | 6        | -0.601              | 0.812 | 0.332 |
| Lmod2                      | 6        | -1.633              | 1.828 | 0.746 |

Table S2. Cont.

| Gene Symbol                | <i>n</i> | log <sub>2</sub> FC | SD    | SE    |
|----------------------------|----------|---------------------|-------|-------|
| <b>48 DE genes for CvA</b> |          |                     |       |       |
| Lmod3                      | 6        | -1.747              | 1.460 | 0.596 |
| LOC100363332               | 6        | 0.714               | 0.710 | 0.290 |
| LOC499235                  | 6        | 0.643               | 0.958 | 0.391 |
| LOC679149                  | 6        | 0.748               | 0.571 | 0.233 |
| LOC684762                  | 6        | -1.492              | 2.142 | 0.874 |
| Lyn                        | 6        | 1.116               | 1.561 | 0.637 |
| Mb                         | 6        | -1.103              | 0.945 | 0.386 |
| Mcmdc2                     | 6        | 1.168               | 1.851 | 0.756 |
| Mroh1                      | 6        | 0.601               | 0.509 | 0.208 |
| Myog                       | 6        | -0.740              | 0.779 | 0.318 |
| Nags                       | 6        | -1.046              | 1.296 | 0.529 |
| Napb                       | 6        | 0.660               | 0.610 | 0.249 |
| Ndufaf2                    | 6        | -0.691              | 0.543 | 0.222 |
| Ntn1                       | 6        | 0.692               | 0.384 | 0.157 |
| Olr1714                    | 6        | -0.800              | 0.750 | 0.306 |
| Olr825                     | 6        | -0.602              | 0.395 | 0.161 |
| Olr94                      | 6        | -0.705              | 1.129 | 0.461 |
| Phf21b                     | 6        | 0.718               | 0.803 | 0.328 |
| Plac8                      | 6        | 0.649               | 0.524 | 0.214 |
| Rasl10b                    | 6        | 0.679               | 0.468 | 0.191 |
| Sdr42e2                    | 6        | -0.856              | 0.826 | 0.337 |
| Slc45a3                    | 6        | 1.109               | 1.591 | 0.650 |
| Slc5a5                     | 6        | -0.678              | 0.543 | 0.222 |
| Slco1b2                    | 6        | -1.415              | 1.668 | 0.681 |
| Tada2b                     | 6        | 1.193               | 1.171 | 0.478 |
| Tnni2                      | 6        | -0.943              | 1.462 | 0.597 |
| Unc45b                     | 6        | -0.839              | 0.939 | 0.383 |
| Vom1r73                    | 6        | -0.592              | 0.620 | 0.253 |
| Zfp498                     | 6        | 0.662               | 0.734 | 0.300 |
| <b>67 DE genes for CvI</b> |          |                     |       |       |
| Amer3                      | 6        | -0.717              | 0.735 | 0.300 |
| Ampd1                      | 6        | -0.827              | 0.826 | 0.337 |
| Bmp8b                      | 6        | -0.668              | 0.736 | 0.301 |
| C2cd4c                     | 6        | -0.651              | 1.088 | 0.444 |
| Cacna1h                    | 6        | 0.640               | 0.468 | 0.191 |
| Cacng1                     | 6        | -1.043              | 0.874 | 0.357 |
| Ccdc81                     | 6        | 0.616               | 0.677 | 0.276 |
| Cdc6                       | 6        | 0.676               | 1.000 | 0.408 |
| Celf6                      | 6        | 0.629               | 0.508 | 0.207 |
| Cramp11                    | 6        | 0.691               | 0.901 | 0.368 |
| Crb3                       | 6        | 0.888               | 0.610 | 0.249 |
| Cxcl17                     | 6        | 0.695               | 0.739 | 0.302 |
| Cyp17a1                    | 6        | -0.730              | 0.953 | 0.389 |
| Cyp4a1                     | 6        | -0.654              | 0.980 | 0.400 |
| Efna3                      | 6        | 0.695               | 0.932 | 0.380 |
| Egr3                       | 6        | -0.772              | 0.751 | 0.307 |
| F2r12 *                    | 5 *      | 0.864               | 0.928 | 0.415 |
| Galnt7                     | 6        | 0.659               | 0.896 | 0.366 |
| Gapt                       | 6        | -0.712              | 0.775 | 0.317 |
| Grb7                       | 6        | 0.768               | 0.546 | 0.223 |
| Hao1                       | 6        | -0.798              | 0.926 | 0.378 |
| Hfe2                       | 6        | -1.674              | 1.658 | 0.677 |
| Hlcs                       | 6        | -0.586              | 0.573 | 0.234 |

Table S2. Cont.

| Gene Symbol                | <i>n</i> | log <sub>2</sub> FC | SD    | SE    |
|----------------------------|----------|---------------------|-------|-------|
| <b>67 DE genes for CvI</b> |          |                     |       |       |
| Hspb7                      | 6        | -1.303              | 0.928 | 0.379 |
| Htr2c                      | 6        | 1.607               | 1.405 | 0.574 |
| Iqsec3                     | 6        | 0.619               | 0.253 | 0.103 |
| Itpr1p1                    | 6        | -0.792              | 1.495 | 0.610 |
| Klk1c7                     | 6        | -1.221              | 1.553 | 0.634 |
| Krt4                       | 6        | -0.833              | 1.029 | 0.420 |
| Krt5                       | 6        | -0.662              | 0.888 | 0.362 |
| Lbx1                       | 6        | 1.097               | 0.700 | 0.286 |
| Lmod3                      | 6        | -1.647              | 1.365 | 0.557 |
| LOC100364862               | 6        | -0.885              | 0.821 | 0.335 |
| LOC100912563               | 6        | -1.193              | 1.340 | 0.547 |
| LOC294497                  | 6        | -0.614              | 0.799 | 0.326 |
| LOC685406                  | 6        | -0.763              | 0.843 | 0.344 |
| Lyn                        | 6        | 0.730               | 0.465 | 0.190 |
| Magel2                     | 6        | 0.629               | 0.286 | 0.117 |
| Mb                         | 6        | -0.822              | 0.709 | 0.290 |
| Mrgprb4                    | 6        | -0.646              | 0.667 | 0.272 |
| Mybpc2                     | 6        | 0.636               | 0.690 | 0.282 |
| Mypn                       | 6        | -0.711              | 0.604 | 0.247 |
| Ndufaf2                    | 6        | -0.801              | 0.699 | 0.285 |
| Neurog3                    | 6        | -0.753              | 0.890 | 0.364 |
| Oasl                       | 6        | 0.768               | 0.731 | 0.298 |
| Pcdhgb7                    | 6        | 0.614               | 0.780 | 0.318 |
| Pitx3                      | 6        | -0.764              | 1.033 | 0.422 |
| Plekha2                    | 6        | 0.746               | 1.172 | 0.479 |
| Prr16                      | 6        | -0.889              | 0.852 | 0.348 |
| Rbfox2                     | 6        | 0.668               | 0.926 | 0.378 |
| RGD1561114                 | 6        | -0.621              | 1.142 | 0.466 |
| RGD1564095                 | 6        | -0.882              | 0.896 | 0.366 |
| RGD1564571                 | 6        | -0.610              | 0.665 | 0.271 |
| RGD1566248                 | 6        | -1.170              | 1.397 | 0.570 |
| S100pbp                    | 6        | 0.613               | 0.943 | 0.385 |
| Scnn1b                     | 6        | -1.022              | 1.033 | 0.422 |
| Sdr42e2                    | 6        | -0.809              | 0.761 | 0.311 |
| Slc2a3                     | 6        | 0.740               | 0.530 | 0.216 |
| Slc38a8                    | 6        | -0.769              | 1.007 | 0.411 |
| Syne4                      | 6        | 1.013               | 1.484 | 0.606 |
| Tacr3                      | 6        | 0.862               | 1.015 | 0.414 |
| Tada2b                     | 6        | 1.049               | 0.846 | 0.345 |
| Tmem52b                    | 6        | -0.700              | 1.124 | 0.459 |
| Tnni2                      | 6        | -0.847              | 0.902 | 0.368 |
| Txk                        | 6        | 0.712               | 0.906 | 0.370 |
| Unc45b                     | 6        | -0.653              | 0.579 | 0.237 |
| Zp3                        | 6        | -1.078              | 1.171 | 0.478 |

CvN: control versus nicotine; CvA: control versus acetamiprid; CvI: control versus imidacloprid; SD: standard deviation; SE; standard error. \* For Tada2b in CvN, and F2rl2 in CvI, one of six microarrays was compromised and excluded.

**Table S3.** Detailed classification of DE genes for CvN, CvA, and CvI by PANTHER.

| Category of GO Biological Processes                        | Number (%)     | Gene Name                                                                                                                                                                        |
|------------------------------------------------------------|----------------|----------------------------------------------------------------------------------------------------------------------------------------------------------------------------------|
| <b>CvN</b>                                                 |                |                                                                                                                                                                                  |
| biological adhesion (GO:0022610)                           | 3 (5.2)        | Cadm3, Pcdhgb7, Mypn                                                                                                                                                             |
| biological regulation (GO:0065007)                         | 5 (8.6)        | Tada2b, Kcnq5, Cacna1h, Atf7, Nhlh2                                                                                                                                              |
| cellular component organization or biogenesis (GO:0071840) | 3 (5.2)        | Actrt2, Lmod3, Acta1                                                                                                                                                             |
| cellular process (GO:0009987)                              | 17 (29.3)      | Ms4a12, Tada2b, Kcnq5, Gpr83, Actrt2, Lmod3, Cadm3, Acta1, Mcmdc2, Cacna1h, Atf7, Nt5dc1, Pcdhgb7, Vsig2, F2r12, Mypn, Phldb3                                                    |
| developmental process (GO:0032502)                         | 8 (13.8)       | Actrt2, Lmod3, Celf6, Acta1, Cd86, Pcdhgb7, Mypn, Phldb3                                                                                                                         |
| immune system process (GO:0002376)                         | 2 (3.4)        | Gpr83, Phldb3                                                                                                                                                                    |
| localization (GO:0051179)                                  | 4 (6.9)        | Kcnq5, Actrt2, Acta1, Cacna1h                                                                                                                                                    |
| metabolic process (GO:0008152)                             | 8 (13.8)       | Tada2b, Mcmdc2, Atf7, Nt5dc1, Nhlh2, Cyp17a1, Unc45b, Mypn                                                                                                                       |
| multicellular organismal process (GO:0032501)              | 4 (6.9)        | Gpr83, Lmod3, Celf6, Mypn                                                                                                                                                        |
| response to stimulus (GO:0050896)                          | 4 (6.9)        | Ms4a12, Gpr83, Unc45b, Phldb3                                                                                                                                                    |
| 10 categories for CvN                                      | Total 58 (100) |                                                                                                                                                                                  |
| <b>CvA</b>                                                 |                |                                                                                                                                                                                  |
| apoptotic process (GO:0006915)                             | 1 (1.1)        | Lyn                                                                                                                                                                              |
| biological adhesion (GO:0022610)                           | 3 (3.2)        | Ntn1, Rasl10b, Lyn                                                                                                                                                               |
| biological regulation (GO:0065007)                         | 7 (7.5)        | Olr1714, Tada2b, Asap2, Myog, Lyn, Cacna1h, Phf21b                                                                                                                               |
| cellular component organization or biogenesis (GO:0071840) | 8 (8.6)        | Myog, Actrt2, Lmod3, Napb, Lyn, Lmod2, Des, Actc1                                                                                                                                |
| cellular process (GO:0009987)                              | 20 (21.5)      | B3gnt9, Olr1714, Tada2b, Ntn1, Asap2, Rasl10b, Fyb, Myog, Actrt2, Lmod3, Napb, Lyn, Mcmdc2, Cacna1h, Dmbt1, Dcdc2, F2r12, Lmod2, Des, Actc1                                      |
| developmental process (GO:0032502)                         | 10 (10.8)      | B3gnt9, Ntn1, Myog, Actrt2, Lmod3, Lyn, Tnni2, Lmod2, Des, Actc1                                                                                                                 |
| immune system process (GO:0002376)                         | 3 (3.2)        | Lyn, Dmbt1, Dcdc2                                                                                                                                                                |
| localization (GO:0051179)                                  | 11 (11.8)      | Rasl10b, Actrt2, Slco1b2, Napb, Lyn, Cacna1h, Dmbt1, Mb, Slc5a5, Slc45a3, Actc1                                                                                                  |
| locomotion (GO:0040011)                                    | 1 (1.1)        | Lyn                                                                                                                                                                              |
| metabolic process (GO:0008152)                             | 15 (16.1)      | B3gnt9, Tada2b, Asap2, Rasl10b, LOC679149, Myog, Nags, Hsd3b1, Lyn, Mcmdc2, Dmbt1, Slc5a5, Slc45a3, Phf21b, Unc45b                                                               |
| multicellular organismal process (GO:0032501)              | 10 (10.8)      | B3gnt9, Olr1714, Ntn1, Rasl10b, Myog, Lmod3, Lyn, Tnni2, Mb, Lmod2                                                                                                               |
| reproduction (GO:0000003)                                  | 1 (1.1)        | B3gnt9                                                                                                                                                                           |
| response to stimulus (GO:0050896)                          | 3 (3.2)        | Olr1714, Lyn, Unc45b                                                                                                                                                             |
| 13 categories for CvA                                      | Total 93 (100) |                                                                                                                                                                                  |
| <b>CvI</b>                                                 |                |                                                                                                                                                                                  |
| apoptotic process (GO:0006915)                             | 3 (2.4)        | Magel2, Bmp8b, Lyn                                                                                                                                                               |
| biological adhesion (GO:0022610)                           | 4 (3.2)        | RGD1564571, Lyn, Pcdhgb7, Mypn                                                                                                                                                   |
| biological regulation (GO:0065007)                         | 15 (11.9)      | Lbx1, Efna3, Tada2b, Txk, Hfe2, Neurog3, Scnn1b, Bmp8b, RGD1561114, Tacr3, Lyn, Pitx3, Cacna1h, RGD1566248, Crb3                                                                 |
| cellular component organization or biogenesis (GO:0071840) | 6 (4.8)        | Krt4, Efna3, Iqsec3, Krt5, Lmod3, Lyn                                                                                                                                            |
| cellular process (GO:0009987)                              | 24 (19.0)      | Krt4, RGD1564571, Efna3, Tada2b, Txk, Iqsec3, Krt5, Hfe2, Lmod3, Magel2, Bmp8b, RGD1561114, Tacr3, Lyn, Grb7, Cacna1h, Slc38a8, Pcdhgb7, F2r12, Mrgprb4, Mypn, Crb3, Htr2c, Cdc6 |
| developmental process (GO:0032502)                         | 16 (12.7)      | Krt4, Lbx1, Efna3, Txk, Krt5, Lmod3, Neurog3, Magel2, Bmp8b, Celf6, Lyn, Pitx3, Tnni2, Pcdhgb7, Mypn, Crb3                                                                       |
| growth (GO:0040007)                                        | 1 (0.8)        | Txk                                                                                                                                                                              |
| immune system process (GO:0002376)                         | 5 (4.0)        | RGD1564571, Oasl, Txk, Lyn, Crb3                                                                                                                                                 |
| localization (GO:0051179)                                  | 7 (5.6)        | RGD1564571, Scnn1b, Lyn, Cacna1h, Mb, Slc38a8, Crb3                                                                                                                              |
| locomotion (GO:0040011)                                    | 2 (1.6)        | Efna3, Lyn                                                                                                                                                                       |
| metabolic process (GO:0008152)                             | 22 (17.5)      | Lbx1, Hao1, Oasl, Tada2b, Txk, Hlcs, Hfe2, Neurog3, Bmp8b, RGD1564095, RGD1561114, Tacr3, Lyn, Pitx3, RGD1566248,, Galnt7, Ampd1, Cyp17a1, Unc45b, Mypn, Crb3, Cdc6              |
| multicellular organismal process (GO:0032501)              | 11 (8.7)       | Efna3, Txk, Lmod3, Scnn1b, Celf6, Lyn, Pitx3, Tnni2, Mb, Mypn, Htr2c                                                                                                             |
| reproduction (GO:0000003)                                  | 1 (0.8)        | Magel2                                                                                                                                                                           |

**Table S3.** *Cont.*

| Category of GO Biological Processes | Number (%)      | Gene Name                                                     |
|-------------------------------------|-----------------|---------------------------------------------------------------|
| <b>CvI</b>                          |                 |                                                               |
| response to stimulus (GO:0050896)   | 9 (7.1)         | RGD1564571, Efna3, Oasl, Txk, Hfe2, Bmp8b, Tacr3, Lyn, Unc45b |
| 14 categories for CvI               | Total 126 (100) |                                                               |

DE: differentially expressed; CvN: control versus nicotine; CvA: control versus acetamiprid;  
CvI: control versus imidacloprid; GO: gene ontology.

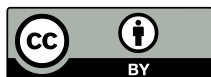

© 2016 by the authors. Submitted for possible open access publication under the terms and conditions of the Creative Commons Attribution (CC-BY) license (<http://creativecommons.org/licenses/by/4.0/>).
